# Supplementary material for: Rotational motion and rheotaxis of human sperm do not require functional CatSper channels and transmembrane Ca2+ signaling
Source: PubMed Central journal article supplement — EMBO J. 2020 Jan 19;39(4):e102363. doi: 10.15252/embj.2019102363 (PMC7024840; doi:10.15252/embj.2019102363), 2020-01-19
Supplement: EMBJ-39-e102363-s001.pdf [file EMBJ-39-e102363-s001.pdf]

## Expanded View Figures

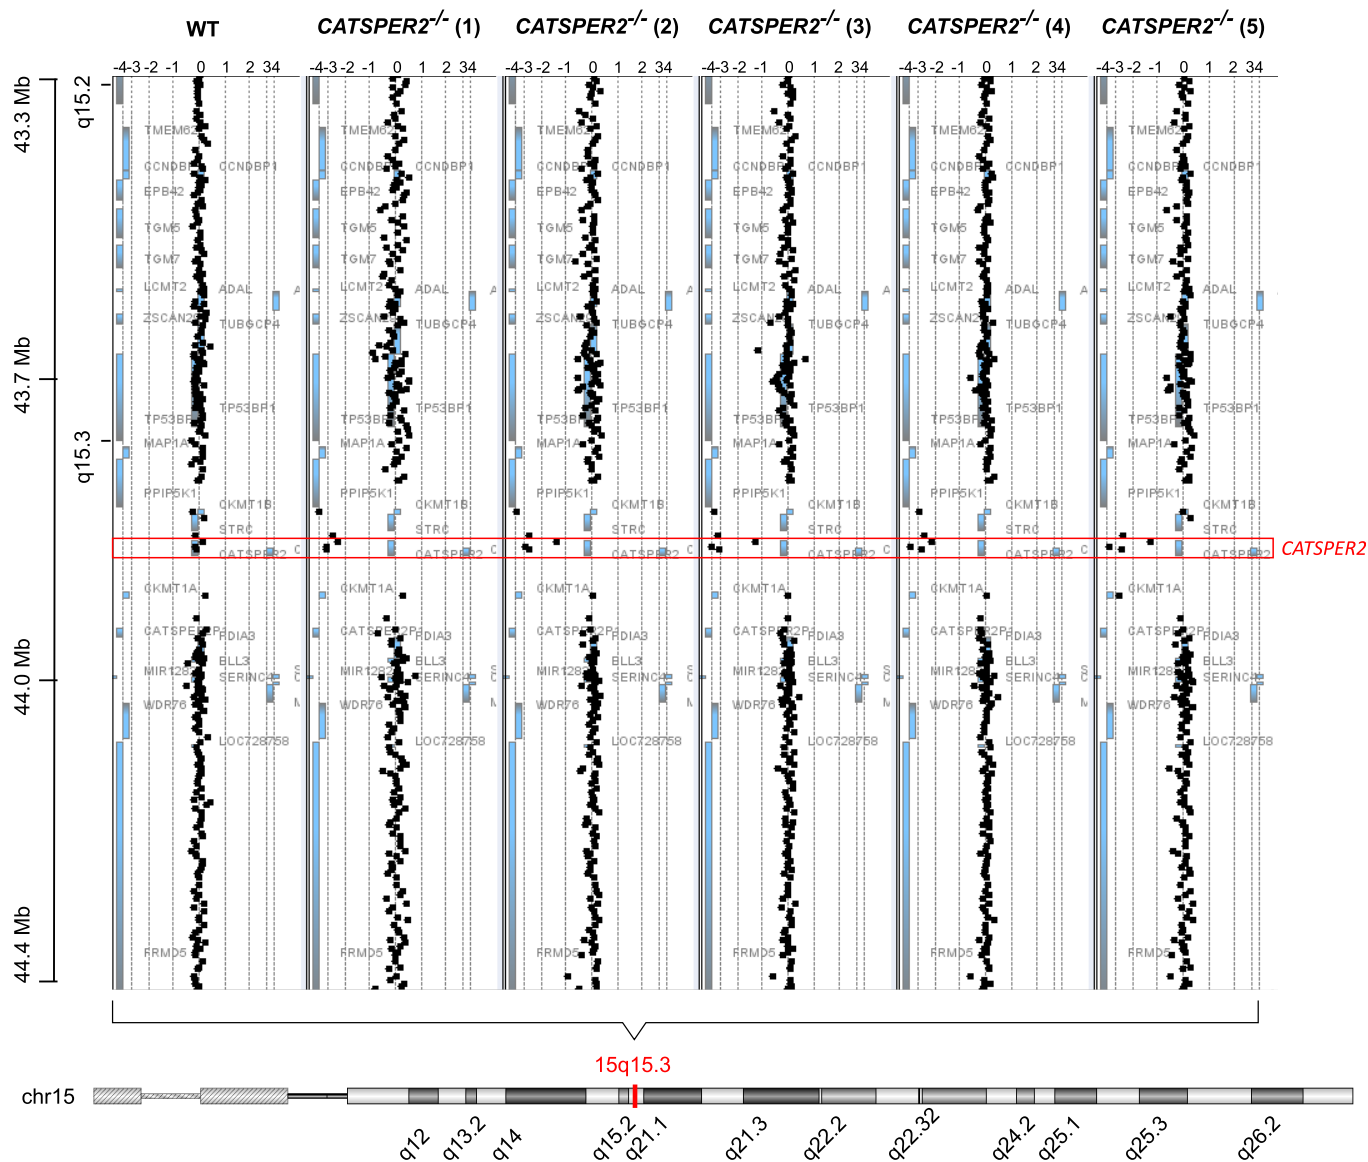

**Figure EV1. Array comparative genomic hybridization analysis (array CGH).**  
 Array CGH analysis (e.g., Tüttelmann *et al*, 2011) of DNA copy number variants (CNV) in a healthy donor (WT) and the five patients (*CATSPER2*<sup>-/-</sup> 1–5) suffering from the deafness-infertility syndrome. The black squares represent the fluorescence intensity ratios (log<sub>2</sub>) upon cohybridization of fluorescence-labeled genomic DNA fragments of the healthy donor or patients and controls (reference). Gene dosage variations are indicated by a fluorescence ratio ≠ 0. A ratio of < -1.5 indicates a homozygous deletion.

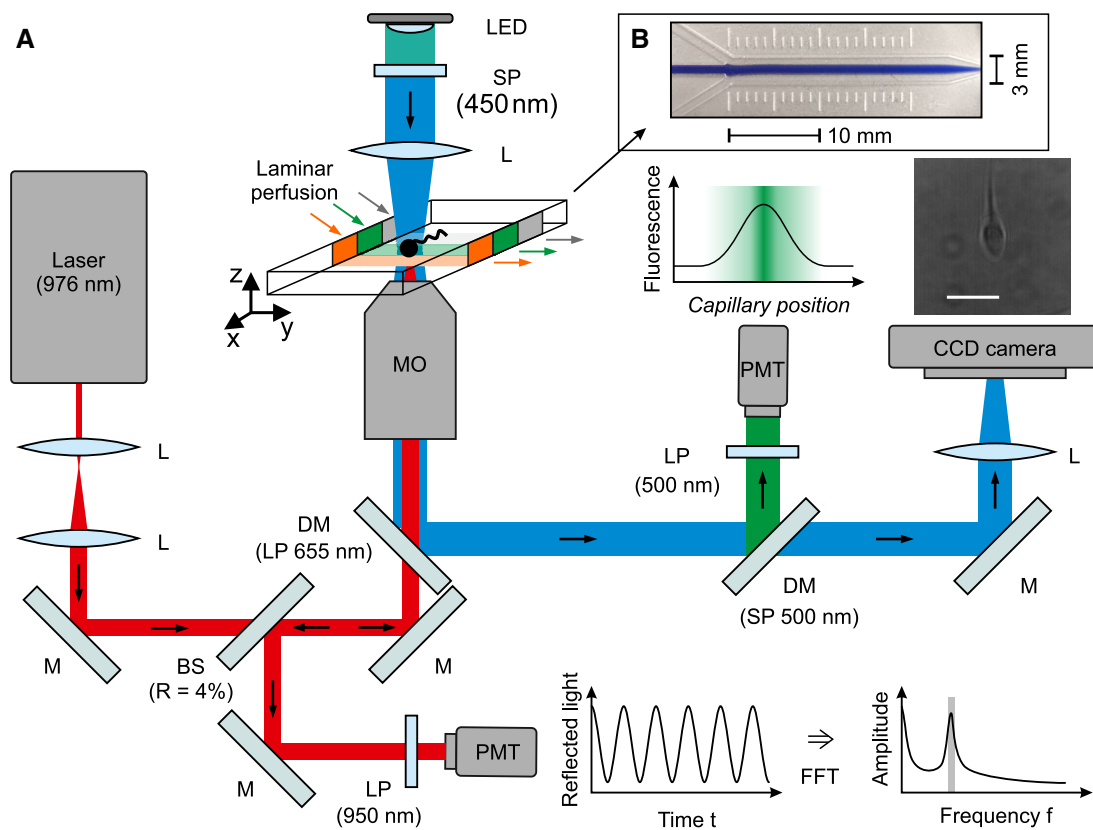

**Figure EV2. Optical trapping and microfluidics setup to study longitudinal rotation in human sperm.**

A A detailed description is provided in the materials and methods section. BS, beam splitter. DM, dichroic mirror. L, lens. LP, long-pass filter. M, mirror. PMT, photomultiplier tube. R, reflectivity. SP, short-pass filter. Scale bar represents 10  $\mu$ m.

B Visualization of the laminar flow profile inside the microfluidics capillary. The center (“barrier”) stream was supported with blue ink for the ease of illustration.
